# Supplementary material
Source: PubMed Central journal article supplement (PMC7669688)
Supplement: NIHMS1627907-supplement-1.pdf [file NIHMS1627907-supplement-1.pdf]

529 **Supplemental Table**

530 Supplemental Table 1. Number (%) of missing data.

| Variable <sup>1</sup>                   | African American      |                     | White                 |                    |
|-----------------------------------------|-----------------------|---------------------|-----------------------|--------------------|
|                                         | Female<br>(*n=31,296) | Male<br>(*n=22,334) | Female<br>(*n=15,200) | Male<br>(*n=9,719) |
| Age at enrollment                       | 0 (0.00)              | 0 (0.00)            | 0 (0.00)              | 0 (0.00)           |
| Source of enrollment                    | 0 (0.00)              | 0 (0.00)            | 0 (0.00)              | 0 (0.00)           |
| County of residence                     | 2 (0.01)              | 6 (0.03)            | 1 (0.01)              | 3 (0.03)           |
| Education completed                     | 25 (0.08)             | 14 (0.06)           | 4 (0.03)              | 9 (0.09)           |
| Annual household income                 | 409 (1.31)            | 238 (1.07)          | 259 (1.70)            | 143 (1.47)         |
| Marital status                          | 113 (0.36)            | 96 (0.43)           | 148 (0.97)            | 221 (2.27)         |
| Body Mass Index (kg/m <sup>2</sup> )    | 500 (1.60)            | 167 (0.75)          | 195 (1.28)            | 65 (0.67)          |
| Currently working                       | 165 (0.53)            | 86 (0.39)           | 77 (0.51)             | 38 (0.39)          |
| Cigarette smoking                       | 172 (0.55)            | 132 (0.59)          | 79 (0.52)             | 130 (1.34)         |
| Total sedentary time                    | 361 (1.15)            | 187 (0.84)          | 80 (0.53)             | 43 (0.44)          |
| Total light, moderate and vigorous work | 213 (0.68)            | 150 (0.67)          | 91 (0.60)             | 85 (0.87)          |
| Total energy intakes                    | 1,847 (5.90)          | 1,854 (8.30)        | 597 (3.93)            | 357 (3.67)         |
| Healthy Eating Index                    | 1,847 (5.90)          | 1,854 (8.30)        | 597 (3.93)            | 357 (3.67)         |
| Dietary intakes (FFQ)                   |                       |                     |                       |                    |
| Fruits/vegetables                       | 282 (0.90)            | 176 (0.79)          | 129 (0.85)            | 122 (1.26)         |
| Bread                                   | 239 (0.76)            | 140 (0.63)          | 103 (0.68)            | 69 (0.71)          |
| Meat                                    | 261 (0.83)            | 122 (0.55)          | 120 (0.79)            | 54 (0.56)          |
| Caffeine use                            | 376 (1.20)            | 212 (0.95)          | 179 (1.18)            | 128 (1.32)         |
| Soda intake                             | 472 (1.51)            | 287 (1.29)          | 333 (2.19)            | 246 (2.53)         |
| Alcohol use                             | 419 (1.34)            | 285 (1.28)          | 224 (1.47)            | 198 (2.04)         |
| Alcohol use among drinkers              | 419/14,173            | 285/15,565          | 224/6,719             | 198/5,932          |

531 1. The data are presented as n (%), n denotes counts of missing, % denotes the fraction of missing data for each  
532 race-sex group, except for variable 'Alcohol use among drinkers, drinks/day'

533 2. Missing data for 'Alcohol use among drinker, drinks/day' was presented as n/N, n denotes counts of missing, N  
534 denotes number of participants who were identified as a drinker (>0 drinks/day).

535 3. '\*' denotes number of participants with at least one self-reported sleep duration

536 Supplemental Table 2a. Socio-demographic, medical, health risk, social and contextual characteristics of study participants (whites)

| Variable                                      | Sleep duration in males (h/day) |              |              |              |         | Sleep duration in females (h/day) |              |              |              |         |
|-----------------------------------------------|---------------------------------|--------------|--------------|--------------|---------|-----------------------------------|--------------|--------------|--------------|---------|
|                                               | <5 h                            | 5–6 h        | 7–8 h        | ≥9 h         | p-value | <5 h                              | 5–6 h        | 7–8 h        | ≥9 h         | p-value |
| <b>Number of participants, n (%)</b>          | 565 (5.8)                       | 2,744 (28.2) | 5,194 (53.4) | 1,216 (12.5) |         | 1,046 (6.9)                       | 4,495 (29.6) | 7,649 (50.3) | 2,010 (13.2) |         |
| <b>Source of enrollment, n (%)</b>            |                                 |              |              |              |         |                                   |              |              |              |         |
| Community Health Center                       | 535 (94.7)                      | 2,080 (75.8) | 3,022 (58.2) | 882 (72.5)   | < .0001 | 989 (94.6)                        | 3,866 (86.0) | 5,787 (75.7) | 1,634 (81.3) | < .0001 |
| General Population mailing                    | 30 (5.3)                        | 664 (24.2)   | 2,172 (41.8) | 334 (27.5)   |         | 57 (5.4)                          | 629 (14.0)   | 1,862 (24.3) | 376 (18.7)   |         |
| <b>Age at enrollment, years</b>               | 50.1 (7.8)                      | 52.9 (8.7)   | 55.1 (9.2)   | 55.2 (9.7)   | < .0001 | 51.6 (8.1)                        | 53.7 (9.1)   | 54.5 (9.2)   | 53.2 (9.0)   | < .0001 |
| <b>County of residence, n (%)</b>             |                                 |              |              |              |         |                                   |              |              |              |         |
| Rural                                         | 110 (19.5)                      | 576 (21.0)   | 1,283 (24.7) | 303 (24.9)   | 0.0002  | 227 (21.7)                        | 1,097 (24.4) | 1,938 (25.3) | 473 (23.5)   | 0.0402  |
| Urban                                         | 454 (80.5)                      | 2,167 (79.0) | 3,910 (75.3) | 913 (75.1)   |         | 819 (78.3)                        | 3,397 (75.6) | 5,711 (74.7) | 1,537 (76.5) |         |
| <b>Education completed, n (%)</b>             |                                 |              |              |              |         |                                   |              |              |              |         |
| <9 years                                      | 73 (12.9)                       | 245 (8.9)    | 356 (6.9)    | 142 (11.7)   | < .0001 | 143 (13.7)                        | 374 (8.3)    | 471 (6.2)    | 152 (7.6)    | < .0001 |
| 9-11 years                                    | 125 (22.1)                      | 427 (15.6)   | 566 (10.9)   | 201 (16.6)   |         | 251 (24.0)                        | 869 (19.3)   | 1,065 (13.9) | 352 (17.5)   |         |
| High school or equivalent                     | 220 (38.9)                      | 886 (32.3)   | 1,403 (27.0) | 354 (29.2)   |         | 359 (34.3)                        | 1,588 (35.3) | 2,344 (30.6) | 673 (33.5)   |         |
| Some college or junior college                | 107 (18.9)                      | 689 (25.1)   | 1,299 (25.0) | 300 (24.7)   |         | 235 (22.5)                        | 1,178 (26.2) | 2,100 (27.5) | 542 (27.0)   |         |
| College graduate                              | 40 (7.1)                        | 495 (18.1)   | 1,565 (30.2) | 217 (17.9)   |         | 58 (5.5)                          | 484 (10.8)   | 1,668 (21.8) | 290 (14.4)   |         |
| <b>Total household income per year, n (%)</b> |                                 |              |              |              |         |                                   |              |              |              |         |
| <\$15,000                                     | 408 (72.9)                      | 1,239 (45.7) | 1,713 (33.6) | 611 (50.9)   | < .0001 | 767 (74.0)                        | 2,416 (54.4) | 3,067 (41.0) | 1,106 (55.9) | < .0001 |
| \$15,000 - \$24,999                           | 89 (15.9)                       | 539 (19.9)   | 787 (15.4)   | 205 (17.1)   |         | 154 (14.9)                        | 947 (21.3)   | 1,438 (19.2) | 376 (19.0)   |         |
| \$25,000 - \$49,999                           | 42 (7.5)                        | 454 (16.7)   | 967 (19.0)   | 202 (16.8)   |         | 87 (8.4)                          | 648 (14.6)   | 1,448 (19.3) | 283 (14.3)   |         |

|                                                  |               |                 |                 |               |         |               |                 |                 |                 |         |
|--------------------------------------------------|---------------|-----------------|-----------------|---------------|---------|---------------|-----------------|-----------------|-----------------|---------|
| \$50,000+                                        | 21 (3.8)      | 481<br>(17.7)   | 1,635<br>(32.0) | 183<br>(15.2) |         | 29 (2.8)      | 427 (9.6)       | 1,535<br>(20.5) | 213<br>(10.8)   |         |
| <b>Marital status, n (%)</b>                     |               |                 |                 |               |         |               |                 |                 |                 |         |
| Married/living with a partner                    | 193<br>(34.4) | 1,315<br>(48.7) | 3,027<br>(60.0) | 584<br>(49.0) | < .0001 | 358<br>(34.2) | 1,897<br>(42.5) | 3,699<br>(49.0) | 852<br>(42.7)   | < .0001 |
| Divorced/separated                               | 251<br>(44.7) | 876<br>(32.5)   | 1,245<br>(24.7) | 342<br>(28.7) |         | 448<br>(42.8) | 1,593<br>(35.7) | 2,315<br>(30.7) | 744<br>(37.3)   |         |
| Widowed                                          | 19 (3.4)      | 115 (4.3)       | 158 (3.1)       | 50 (4.2)      |         | 142<br>(13.6) | 669<br>(15.0)   | 956<br>(12.7)   | 233<br>(11.7)   |         |
| Never been married                               | 98 (17.5)     | 392<br>(14.5)   | 618<br>(12.2)   | 215<br>(18.1) |         | 98 (9.4)      | 308 (6.9)       | 576 (7.6)       | 164 (8.2)       |         |
| <b>Body mass index (kg/m<sup>2</sup>), n (%)</b> |               |                 |                 |               |         |               |                 |                 |                 |         |
| <18.5                                            | 9 (1.6)       | 32 (1.2)        | 27 (0.5)        | 18 (1.5)      | < .0001 | 24 (2.3)      | 99 (2.2)        | 116 (1.5)       | 27 (1.4)        | < .0001 |
| 18.5-24.9                                        | 175<br>(31.3) | 735<br>(27.0)   | 1,444<br>(28.0) | 314<br>(26.0) |         | 218<br>(21.2) | 1,021<br>(23.0) | 2,097<br>(27.7) | 439<br>(22.2)   |         |
| 25-29.9                                          | 176<br>(31.4) | 980<br>(36.0)   | 2,057<br>(39.8) | 386<br>(32.0) |         | 272<br>(26.5) | 1,171<br>(26.4) | 2,035<br>(26.9) | 501<br>(25.4)   |         |
| 30-34.9                                          | 105<br>(18.8) | 572<br>(21.0)   | 1,044<br>(20.2) | 276<br>(22.9) |         | 220<br>(21.4) | 987<br>(22.2)   | 1,605<br>(21.2) | 434<br>(22.0)   |         |
| 35+                                              | 95 (17.0)     | 407<br>(14.9)   | 590<br>(11.4)   | 212<br>(17.6) |         | 292<br>(28.5) | 1,161<br>(26.2) | 1,712<br>(22.6) | 574<br>(29.1)   |         |
| <b>Currently Working, n (%)</b>                  |               |                 |                 |               |         |               |                 |                 |                 |         |
| Yes                                              | 106<br>(18.8) | 1,095<br>(40.0) | 2,491<br>(48.2) | 324<br>(26.8) | < .0001 | 206<br>(19.8) | 1,580<br>(35.4) | 3,472<br>(45.6) | 576<br>(28.7)   | < .0001 |
| No                                               | 457<br>(81.2) | 1,640<br>(60.0) | 2,681<br>(51.8) | 887<br>(73.2) |         | 834<br>(80.2) | 2,889<br>(64.6) | 4,137<br>(54.4) | 1,429<br>(71.3) |         |
| <b>Cigarette Smoking, n (%)</b>                  |               |                 |                 |               |         |               |                 |                 |                 |         |
| Current                                          | 351<br>(62.1) | 1,281<br>(47.2) | 1,761<br>(34.5) | 505<br>(41.8) | < .0001 | 562<br>(53.8) | 1,798<br>(40.2) | 2,263<br>(29.8) | 769<br>(38.5)   | < .0001 |
| Former                                           | 115<br>(20.4) | 821<br>(30.2)   | 1,881<br>(36.9) | 412<br>(34.1) |         | 179<br>(17.1) | 1,100<br>(24.6) | 2,068<br>(27.2) | 523<br>(26.2)   |         |
| Never                                            | 99 (17.5)     | 614<br>(22.6)   | 1,457<br>(28.6) | 292<br>(24.2) |         | 303<br>(29.0) | 1,578<br>(35.3) | 3,275<br>(43.1) | 703<br>(35.2)   |         |
| <b>Sedentary behaviors, h/day</b>                |               |                 |                 |               |         |               |                 |                 |                 |         |
| Sitting in a car or bus                          | 1.5 ± 2.1     | 1.6 ± 1.9       | 1.4 ± 1.7       | 1.4 ± 1.8     | 0.0006  | 1.1 ± 1.7     | 1.2 ± 1.4       | 1.1 ± 1.3       | 1.1 ± 1.5       | 0.0756  |

|                                            |                   |                   |                   |                   |         |                   |                 |                 |                   |         |
|--------------------------------------------|-------------------|-------------------|-------------------|-------------------|---------|-------------------|-----------------|-----------------|-------------------|---------|
| Sitting at work                            | 0.7 ± 2.0         | 1.4 ± 2.6         | 1.8 ± 2.7         | 1.1 ± 2.4         | < .0001 | 0.6 ± 1.7         | 1.1 ± 2.3       | 1.7 ± 2.7       | 1.1 ± 2.3         | < .0001 |
| Watching television or movies              | 4.2 ± 3.7         | 3.5 ± 2.8         | 3.1 ± 2.4         | 4.2 ± 3.2         | < .0001 | 4.0 ± 3.6         | 3.3 ± 2.6       | 3.0 ± 2.4       | 4.1 ± 3.1         | < .0001 |
| Using a home computer                      | 0.5 ± 1.3         | 0.6 ± 1.3         | 0.7 ± 1.2         | 0.6 ± 1.2         | 0.0082  | 0.7 ± 1.5         | 0.7 ± 1.3       | 0.7 ± 1.2       | 0.7 ± 1.3         | 0.7209  |
| Other sitting                              | 2.2 ± 2.3         | 2.0 ± 1.9         | 1.9 ± 1.8         | 2.1 ± 2.1         | < .0001 | 2.8 ± 2.5         | 2.4 ± 2.1       | 2.2 ± 1.8       | 2.6 ± 2.2         | < .0001 |
| <b>Total sedentary time, h/day</b>         | 9.1 ± 5.4         | 9.2 ± 5.0         | 8.9 ± 4.6         | 9.5 ± 5.0         | 0.0008  | 9.1 ± 5.6         | 8.7 ± 4.5       | 8.7 ± 4.2       | 9.6 ± 4.7         | < .0001 |
| <b>Sedentary behaviors, % of wake time</b> | 66 ± 26           | 60 ± 24           | 61 ± 22           | 66 ± 23           | < .0001 | 62 ± 23           | 58 ± 21         | 58 ± 19         | 64 ± 20           | < .0001 |
| <b>Household/occupational, h/day</b>       |                   |                   |                   |                   |         |                   |                 |                 |                   |         |
| Light                                      | 2.2 ± 2.4         | 2.8 ± 2.6         | 2.6 ± 2.4         | 2.3 ± 2.3         | < .0001 | 3.1 ± 2.8         | 3.6 ± 2.8       | 3.5 ± 2.7       | 3.0 ± 2.5         | < .0001 |
| Moderate                                   | 2.0 ± 2.5         | 2.3 ± 2.3         | 2.2 ± 2.2         | 1.9 ± 2.1         | < .0001 | 2.1 ± 2.1         | 2.4 ± 2.1       | 2.3 ± 1.9       | 2.1 ± 1.9         | < .0001 |
| Vigorous                                   | 1.1 ± 2.4         | 1.4 ± 2.4         | 1.1 ± 2.1         | 1.0 ± 2.0         | < .0001 | 0.5 ± 1.4         | 0.5 ± 1.4       | 0.4 ± 1.2       | 0.4 ± 1.2         | < .0001 |
| <b>Walking, h/day</b>                      | 4.2 ± 4.0         | 4.3 ± 3.7         | 3.8 ± 3.2         | 3.4 ± 3.3         | < .0001 | 4.0 ± 3.7         | 4.2 ± 3.6       | 4.0 ± 3.3       | 3.6 ± 3.3         | < .0001 |
| Slow                                       | 3.2 ± 3.2         | 3.2 ± 2.9         | 2.9 ± 2.6         | 2.7 ± 2.7         | < .0001 | 3.1 ± 2.9         | 3.2 ± 2.9       | 3.1 ± 2.7       | 2.8 ± 2.7         | < .0001 |
| Fast                                       | 1.0 ± 2.0         | 1.1 ± 1.9         | 0.9 ± 1.5         | 0.7 ± 1.5         | < .0001 | 0.9 ± 1.9         | 1.0 ± 1.8       | 0.9 ± 1.5       | 0.8 ± 1.6         | 0.0012  |
| <b>Total Walking, MET-h/day</b>            | 11.5 ± 11.3       | 11.8 ± 10.4       | 10.4 ± 8.9        | 9.3 ± 9.1         | < .0001 | 10.9 ± 10.4       | 11.4 ± 10.1     | 10.9 ± 9.1      | 9.7 ± 9.3         | < .0001 |
| <b>Total Work, MET-h/day</b>               | 19.6 ± 23.6       | 23.6 ± 21.9       | 21.6 ± 19.1       | 18.4 ± 19.2       | < .0001 | 18.6 ± 17.2       | 21.1 ± 16.7     | 19.7 ± 14.5     | 17.9 ± 14.7       | < .0001 |
| <b>Overall Activity, MET-h/day</b>         | 20.5 ± 24.4       | 25.0 ± 22.6       | 23.4 ± 19.6       | 19.5 ± 20.0       | < .0001 | 19.3 ± 17.7       | 22.0 ± 17.3     | 20.8 ± 14.9     | 18.6 ± 15.3       | < .0001 |
| <b>Dietary Intake (FFQ)</b>                |                   |                   |                   |                   |         |                   |                 |                 |                   |         |
| Total energy, kcal/day                     | 3,120.9 ± 1,597.7 | 2,889.6 ± 1,427.3 | 2,712.3 ± 1,274.7 | 2,858.9 ± 1,370.2 | < .0001 | 2,064.7 ± 1,113.5 | 1,957.7 ± 995.3 | 1,873.8 ± 926.2 | 2,027.7 ± 1,013.3 | < .0001 |
| Total fat intake, g/day                    | 116.6 ± 62.2      | 112.4 ± 58.0      | 105.2 ± 52.9      | 111.2 ± 57.2      | < .0001 | 78.6 ± 46.5       | 75.5 ± 42.3     | 72.3 ± 39.1     | 78.1 ± 42.6       | < .0001 |
| Total saturated fat intake, g/day          | 36.9 ± 20.2       | 35.0 ± 18.8       | 32.5 ± 17.0       | 34.7 ± 18.4       | < .0001 | 24.2 ± 14.7       | 23.4 ± 13.6     | 22.3 ± 12.4     | 24.3 ± 13.8       | < .0001 |
| Total protein intake, g/day                | 115.8 ± 59.6      | 110.5 ± 57.8      | 103.4 ± 51.7      | 108.2 ± 54.9      | < .0001 | 78.4 ± 46.4       | 75.7 ± 42.4     | 73.2 ± 38.9     | 78.4 ± 43.9       | < .0001 |
| Total carbohydrate intake, g/day           | 345.8 ± 163.2     | 327.7 ± 154.4     | 314.7 ± 144.2     | 327.6 ± 150.2     | < .0001 | 258.5 ± 134.8     | 244.6 ± 120.7   | 232.6 ± 113.1   | 251.1 ± 123.8     | < .0001 |
| Fruits and vegetables, servings/day        | 2.9 ± 2.1         | 2.9 ± 1.7         | 3.0 ± 1.6         | 2.9 ± 1.7         | 0.2307  | 3.1 ± 2.0         | 3.1 ± 1.9       | 3.3 ± 1.8       | 3.2 ± 2.0         | < .0001 |

|                                                 |               |                 |                 |               |         |               |                 |                 |                 |         |
|-------------------------------------------------|---------------|-----------------|-----------------|---------------|---------|---------------|-----------------|-----------------|-----------------|---------|
| Bread, servings/day                             | 1.7 ± 1.2     | 1.8 ± 1.0       | 1.9 ± 1.0       | 1.9 ± 1.1     | 0.0005  | 1.5 ± 1.0     | 1.7 ± 1.1       | 1.8 ± 1.0       | 1.8 ± 1.1       | < .0001 |
| Meat, servings/day                              | 1.7 ± 1.1     | 1.7 ± 1.0       | 1.7 ± 0.9       | 1.8 ± 1.0     | 0.0251  | 1.3 ± 1.0     | 1.4 ± 0.9       | 1.5 ± 0.9       | 1.6 ± 1.0       | < .0001 |
| <b>Healthy Eating Index (HEI-2010), score</b>   | 51.5 ± 11.5   | 54.2 ± 12.0     | 56.9 ± 12.6     | 54.1 ± 11.6   | < .0001 | 56.6 ± 12.2   | 57.8 ± 12.5     | 60.3 ± 12.7     | 57.5 ± 12.3     | < .0001 |
| <b>Caffeine use (regular coffee), times/day</b> | 1.1 ± 1.2     | 1.2 ± 1.2       | 1.2 ± 1.2       | 1.1 ± 1.2     | 0.0042  | 1.0 ± 1.2     | 1.0 ± 1.2       | 1.0 ± 1.2       | 0.9 ± 1.1       | 0.0037  |
| <b>Soda intake, times/day</b>                   | 1.0 ± 1.3     | 1.1 ± 1.3       | 1.0 ± 1.2       | 1.1 ± 1.3     | < .0001 | 1.3 ± 1.5     | 1.2 ± 1.4       | 1.0 ± 1.3       | 1.2 ± 1.4       | < .0001 |
| <b>Alcohol Use, n (%)</b>                       |               |                 |                 |               |         |               |                 |                 |                 |         |
| Yes                                             | 302<br>(54.2) | 1611<br>(59.8)  | 3172<br>(62.5)  | 649<br>(54.2) | < .0001 | 368<br>(35.8) | 1734<br>(39.1)  | 3530<br>(46.9)  | 863<br>(43.4)   | < .0001 |
| No                                              | 255<br>(45.8) | 1,081<br>(40.2) | 1,903<br>(37.5) | 548<br>(45.8) |         | 661<br>(64.2) | 2,698<br>(60.9) | 3,996<br>(53.1) | 1,126<br>(56.6) |         |
| <b>Alcohol, drinks/day</b>                      | 5.7 ± 8.9     | 3.5 ± 6.4       | 2.6 ± 5.0       | 3.5 ± 6.4     | < .0001 | 1.5 ± 4.3     | 1.0 ± 3.1       | 0.9 ± 2.7       | 1.2 ± 3.2       | 0.0001  |

537

538

539 Supplemental Table 2b. Socio-demographic, medical, health risk, social and contextual characteristics of study participants (African Americans)

| Variable                                      | Sleep duration in males (h/day) |              |               |              |         | Sleep duration in females (h/day) |              |               |              |         |
|-----------------------------------------------|---------------------------------|--------------|---------------|--------------|---------|-----------------------------------|--------------|---------------|--------------|---------|
|                                               | <5 h                            | 5–6 h        | 7–8 h         | ≥9 h         | p-value | <5 h                              | 5–6 h        | 7–8 h         | ≥9 h         | p-value |
| <b>Number of participants, n (%)</b>          | 1,258 (5.6)                     | 6,300 (28.2) | 10,123 (45.3) | 4,653 (20.8) |         | 2,061 (6.6)                       | 9,296 (29.7) | 14,244 (45.5) | 5,695 (18.2) |         |
| <b>Source of enrollment, n (%)</b>            |                                 |              |               |              |         |                                   |              |               |              |         |
| Community Health Center                       | 1,199 (95.3)                    | 5,714 (90.7) | 9,224 (91.1)  | 4,216 (90.6) | < .0001 | 1,957 (95.0)                      | 8,513 (91.6) | 12,950 (90.9) | 5,125 (90.0) | < .0001 |
| General Population mailing                    | 59 (4.7)                        | 586 (9.3)    | 899 (8.9)     | 437 (9.4)    |         | 104 (5.0)                         | 783 (8.4)    | 1,294 (9.1)   | 570 (10.0)   |         |
| <b>Age at enrollment, years</b>               | 50.4 (7.0)                      | 50.7 (7.8)   | 51.1 (8.2)    | 51.0 (8.4)   | 0.0058  | 50.9 (8.0)                        | 52.0 (8.7)   | 52.2 (9.0)    | 51.0 (8.6)   | < .0001 |
| <b>County of residence, n (%)</b>             |                                 |              |               |              |         |                                   |              |               |              |         |
| Rural                                         | 247 (19.6)                      | 1,221 (19.4) | 2,081 (20.6)  | 991 (21.3)   | 0.0769  | 484 (23.5)                        | 2,257 (24.3) | 3,866 (27.1)  | 1,492 (26.2) | < .0001 |
| Urban                                         | 1,010 (80.4)                    | 5,077 (80.6) | 8,039 (79.4)  | 3,662 (78.7) |         | 1,577 (76.5)                      | 7,038 (75.7) | 10,378 (72.9) | 4,202 (73.8) |         |
| <b>Education completed, n (%)</b>             |                                 |              |               |              |         |                                   |              |               |              |         |
| <9 years                                      | 133 (10.6)                      | 497 (7.9)    | 842 (8.3)     | 486 (10.5)   | < .0001 | 212 (10.3)                        | 583 (6.3)    | 1,041 (7.3)   | 437 (7.7)    | < .0001 |
| 9-11 years                                    | 337 (26.8)                      | 1,380 (21.9) | 2,468 (24.4)  | 1,313 (28.3) |         | 586 (28.4)                        | 1,985 (21.4) | 3,076 (21.6)  | 1,386 (24.4) |         |
| High school or equivalent                     | 436 (34.7)                      | 2,182 (34.7) | 3,668 (36.2)  | 1,673 (36.0) |         | 636 (30.9)                        | 2,997 (32.3) | 4,677 (32.9)  | 1,931 (33.9) |         |
| Some college or junior college                | 256 (20.4)                      | 1,598 (25.4) | 2,228 (22.0)  | 890 (19.2)   |         | 482 (23.4)                        | 2,619 (28.2) | 3,722 (26.2)  | 1,454 (25.6) |         |
| College graduate                              | 94 (7.5)                        | 640 (10.2)   | 915 (9.0)     | 284 (6.1)    |         | 144 (7.0)                         | 1,104 (11.9) | 1,717 (12.1)  | 482 (8.5)    |         |
| <b>Total household income per year, n (%)</b> |                                 |              |               |              |         |                                   |              |               |              |         |
| <\$15,000                                     | 852 (68.8)                      | 3,507 (56.3) | 5,774 (57.6)  | 3,057 (66.3) | < .0001 | 1,418 (69.8)                      | 5,234 (57.0) | 8,025 (57.1)  | 3,590 (63.8) | < .0001 |
| \$15,000 - \$24,999                           | 223 (18.0)                      | 1,340 (21.5) | 2,261 (22.6)  | 886 (19.2)   |         | 393 (19.4)                        | 2,178 (23.7) | 3,316 (23.6)  | 1,237 (22.0) |         |
| \$25,000 - \$49,999                           | 125 (10.1)                      | 910 (14.6)   | 1,286 (12.8)  | 489 (10.6)   |         | 168 (8.3)                         | 1,269 (13.8) | 1,904 (13.5)  | 608 (10.8)   |         |

|                                       |            |              |              |              |         |              |              |              |              |         |
|---------------------------------------|------------|--------------|--------------|--------------|---------|--------------|--------------|--------------|--------------|---------|
| \$50,000+                             | 38 (3.1)   | 473 (7.6)    | 697 (7.0)    | 178 (3.9)    |         | 52 (2.6)     | 495 (5.4)    | 808 (5.7)    | 192 (3.4)    |         |
| <b>Marital status, n (%)</b>          |            |              |              |              |         |              |              |              |              |         |
| Married/living with a partner         | 352 (28.0) | 2,012 (32.1) | 3,368 (33.4) | 1,389 (30.0) | < .0001 | 421 (20.5)   | 2,517 (27.2) | 4,019 (28.3) | 1,455 (25.7) | < .0001 |
| Divorced/separated                    | 487 (38.7) | 2,182 (34.8) | 3,270 (32.5) | 1,543 (33.3) |         | 782 (38.1)   | 3,334 (36.0) | 4,796 (33.8) | 1,906 (33.6) |         |
| Widowed                               | 49 (3.9)   | 232 (3.7)    | 366 (3.6)    | 172 (3.7)    |         | 282 (13.7)   | 1,335 (14.4) | 2,067 (14.6) | 715 (12.6)   |         |
| Never been married                    | 369 (29.4) | 1,848 (29.5) | 3,071 (30.5) | 1,528 (33.0) |         | 570 (27.7)   | 2,081 (22.5) | 3,308 (23.3) | 1,595 (28.1) |         |
| <b>Body mass index (kg/m2), n (%)</b> |            |              |              |              |         |              |              |              |              |         |
| <18.5                                 | 21 (1.7)   | 86 (1.4)     | 122 (1.2)    | 58 (1.3)     | < .0001 | 26 (1.3)     | 88 (1.0)     | 142 (1.0)    | 71 (1.3)     | < .0001 |
| 18.5-24.9                             | 416 (33.3) | 2,099 (33.5) | 3,488 (34.7) | 1,724 (37.4) |         | 306 (15.1)   | 1,361 (14.9) | 2,114 (15.1) | 1,032 (18.4) |         |
| 25-29.9                               | 407 (32.6) | 2,172 (34.7) | 3,650 (36.3) | 1,548 (33.6) |         | 498 (24.6)   | 2,260 (24.7) | 3,674 (26.2) | 1,406 (25.1) |         |
| 30-34.9                               | 231 (18.5) | 1,185 (18.9) | 1,762 (17.5) | 793 (17.2)   |         | 444 (22.0)   | 2,259 (24.7) | 3,653 (26.1) | 1,317 (23.5) |         |
| >35                                   | 173 (13.9) | 726 (11.6)   | 1,023 (10.2) | 483 (10.5)   |         | 747 (37.0)   | 3,187 (34.8) | 4,429 (31.6) | 1,782 (31.8) |         |
| <b>Currently Working, n (%)</b>       |            |              |              |              |         |              |              |              |              |         |
| Yes                                   | 344 (27.4) | 2,608 (41.6) | 4,130 (41.0) | 1,461 (31.5) | < .0001 | 567 (27.7)   | 3,972 (42.9) | 6,122 (43.2) | 1,846 (32.6) | < .0001 |
| No                                    | 912 (72.6) | 3,668 (58.4) | 5,954 (59.0) | 3,171 (68.5) |         | 1,482 (72.3) | 5,277 (57.1) | 8,046 (56.8) | 3,819 (67.4) |         |
| <b>Cigarette Smoking, n (%)</b>       |            |              |              |              |         |              |              |              |              |         |
| Current                               | 740 (59.2) | 3,459 (55.2) | 5,577 (55.4) | 2,822 (61.1) | < .0001 | 772 (37.6)   | 2,842 (30.7) | 4,316 (30.5) | 2,196 (38.8) | < .0001 |
| Former                                | 247 (19.8) | 1,335 (21.3) | 2,168 (21.5) | 907 (19.6)   |         | 369 (18.0)   | 1,906 (20.6) | 2,856 (20.2) | 1,010 (17.9) |         |
| Never                                 | 262 (21.0) | 1,476 (23.5) | 2,318 (23.0) | 891 (19.3)   |         | 912 (44.4)   | 4,498 (48.6) | 7,000 (49.4) | 2,447 (43.3) |         |
| <b>Sedentary behaviors, h/day</b>     |            |              |              |              |         |              |              |              |              |         |
| Sitting in a car or bus               | 1.6 ± 2.1  | 1.7 ± 2.1    | 1.7 ± 2.0    | 1.7 ± 2.2    | 0.2553  | 1.3 ± 1.7    | 1.4 ± 1.6    | 1.3 ± 1.6    | 1.4 ± 1.7    | 0.0055  |
| Sitting at work                       | 0.8 ± 2.0  | 1.3 ± 2.4    | 1.3 ± 2.4    | 1.1 ± 2.4    | < .0001 | 0.9 ± 2.2    | 1.4 ± 2.5    | 1.5 ± 2.6    | 1.2 ± 2.4    | < .0001 |

|                                            |                   |                   |                   |                   |         |                   |                   |                   |                   |         |
|--------------------------------------------|-------------------|-------------------|-------------------|-------------------|---------|-------------------|-------------------|-------------------|-------------------|---------|
| Watching television or movies              | 4.7 ± 3.9         | 3.9 ± 3.1         | 3.9 ± 2.8         | 4.7 ± 3.3         | < .0001 | 4.2 ± 3.6         | 3.8 ± 2.9         | 3.7 ± 2.8         | 4.5 ± 3.3         | < .0001 |
| Using a home computer                      | 0.3 ± 1.0         | 0.4 ± 1.0         | 0.3 ± 0.9         | 0.3 ± 0.9         | < .0001 | 0.5 ± 1.2         | 0.5 ± 1.2         | 0.5 ± 1.1         | 0.4 ± 1.1         | < .0001 |
| Other sitting                              | 2.1 ± 2.0         | 2.0 ± 1.9         | 2.0 ± 1.8         | 2.1 ± 2.0         | < .0001 | 2.4 ± 2.2         | 2.4 ± 2.0         | 2.3 ± 2.0         | 2.6 ± 2.2         | < .0001 |
| <b>Total sedentary time, h/day</b>         | 9.5 ± 5.7         | 9.3 ± 5.2         | 9.2 ± 5.2         | 9.9 ± 5.6         | < .0001 | 9.3 ± 5.6         | 9.5 ± 5.1         | 9.4 ± 5.0         | 10.2 ± 5.5        | < .0001 |
| <b>Sedentary behaviors, % of wake time</b> | 63 ± 25           | 59 ± 23           | 59 ± 23           | 62 ± 24           | < .0001 | 61 ± 22           | 59 ± 20           | 59 ± 19           | 61 ± 20           | < .0001 |
| <b>Household/occupational, h/day</b>       |                   |                   |                   |                   |         |                   |                   |                   |                   |         |
| Light                                      | 2.6 ± 2.8         | 2.8 ± 2.6         | 2.7 ± 2.6         | 2.6 ± 2.6         | 0.0010  | 3.2 ± 2.9         | 3.5 ± 2.8         | 3.5 ± 2.7         | 3.3 ± 2.6         | < .0001 |
| Moderate                                   | 2.1 ± 2.3         | 2.4 ± 2.3         | 2.4 ± 2.3         | 2.3 ± 2.4         | < .0001 | 2.2 ± 2.1         | 2.4 ± 2.0         | 2.4 ± 2.0         | 2.4 ± 2.1         | 0.0048  |
| Vigorous                                   | 1.2 ± 2.4         | 1.5 ± 2.5         | 1.5 ± 2.5         | 1.4 ± 2.5         | < .0001 | 0.5 ± 1.5         | 0.5 ± 1.4         | 0.4 ± 1.3         | 0.4 ± 1.2         | 0.0001  |
| <b>Walking, h/day</b>                      | 4.5 ± 4.0         | 4.5 ± 3.8         | 4.5 ± 3.7         | 4.5 ± 3.9         | 0.8314  | 4.1 ± 3.7         | 4.2 ± 3.6         | 4.0 ± 3.4         | 3.9 ± 3.6         | < .0001 |
| Slow                                       | 3.3 ± 3.2         | 3.3 ± 3.0         | 3.2 ± 2.9         | 3.2 ± 2.9         | 0.2962  | 3.0 ± 2.9         | 3.1 ± 2.8         | 3.0 ± 2.8         | 2.9 ± 2.8         | < .0001 |
| Fast                                       | 1.2 ± 2.1         | 1.3 ± 2.0         | 1.3 ± 2.0         | 1.3 ± 2.1         | 0.7103  | 1.0 ± 1.9         | 1.0 ± 1.8         | 1.0 ± 1.8         | 1.0 ± 1.8         | 0.2665  |
| <b>Total Walking, MET-h/day</b>            | 12.4 ± 11.5       | 12.5 ± 10.9       | 12.5 ± 10.7       | 12.4 ± 11.2       | 0.8998  | 11.1 ± 10.5       | 11.4 ± 10.2       | 10.9 ± 9.8        | 10.7 ± 10.4       | 0.0002  |
| <b>Total Work, MET-h/day</b>               | 21.5 ± 22.7       | 24.7 ± 22.1       | 25.2 ± 22.3       | 23.7 ± 22.4       | < .0001 | 19.4 ± 17.2       | 20.6 ± 15.7       | 20.2 ± 14.9       | 19.6 ± 15.4       | 0.0005  |
| <b>Overall Activity, MET-h/day</b>         | 22.8 ± 23.5       | 26.4 ± 22.9       | 26.9 ± 23.3       | 25.2 ± 23.4       | < .0001 | 20.1 ± 17.7       | 21.4 ± 16.2       | 21.0 ± 15.4       | 20.5 ± 16.1       | 0.0009  |
| <b>Dietary Intake (FFQ)</b>                |                   |                   |                   |                   |         |                   |                   |                   |                   |         |
| Total energy, kcal/day                     | 3,187.7 ± 1,683.1 | 3,123.9 ± 1,600.7 | 3,166.4 ± 1,624.1 | 3,270.6 ± 1,678.9 | 0.0001  | 2,501.6 ± 1,507.6 | 2,286.2 ± 1,293.5 | 2,297.3 ± 1,300.0 | 2,513.1 ± 1,435.4 | < .0001 |
| Total fat intake, g/day                    | 116.9 ± 68.4      | 115.5 ± 64.6      | 117.5 ± 65.8      | 121.8 ± 68.7      | < .0001 | 97.0 ± 64.3       | 88.3 ± 55.5       | 88.4 ± 55.8       | 97.5 ± 61.7       | < .0001 |
| Total saturated fat intake, g/day          | 35.1 ± 20.9       | 34.4 ± 19.6       | 35.1 ± 20.1       | 36.6 ± 21.0       | < .0001 | 29.0 ± 19.8       | 26.1 ± 17.0       | 26.1 ± 17.1       | 29.0 ± 19.0       | < .0001 |
| Total protein intake, g/day                | 116.5 ± 67.6      | 114.2 ± 63.3      | 116.4 ± 64.4      | 120.4 ± 66.4      | < .0001 | 95.1 ± 64.4       | 86.3 ± 53.7       | 87.2 ± 54.5       | 94.5 ± 59.5       | < .0001 |
| Total carbohydrate intake, g/day           | 363.4 ± 196.0     | 359.6 ± 184.2     | 368.0 ± 188.1     | 379.8 ± 198.6     | < .0001 | 302.7 ± 175.7     | 282.0 ± 152.8     | 283.7 ± 152.9     | 304.1 ± 166.1     | < .0001 |
| Fruits and vegetables, servings/day        | 3.4 ± 2.4         | 3.3 ± 2.0         | 3.4 ± 2.0         | 3.6 ± 2.4         | < .0001 | 3.7 ± 2.7         | 3.5 ± 2.1         | 3.6 ± 2.1         | 3.8 ± 2.4         | < .0001 |
| Bread, servings/day                        | 1.9 ± 1.3         | 1.9 ± 1.1         | 1.9 ± 1.1         | 2.0 ± 1.2         | < .0001 | 1.7 ± 1.2         | 1.7 ± 1.1         | 1.7 ± 1.1         | 1.9 ± 1.3         | < .0001 |



|                                                 |             |              |              |              |         |              |              |              |              |         |
|-------------------------------------------------|-------------|--------------|--------------|--------------|---------|--------------|--------------|--------------|--------------|---------|
| Meat, servings/day                              | 2.1 ± 1.2   | 2.1 ± 1.1    | 2.2 ± 1.1    | 2.3 ± 1.2    | < .0001 | 1.9 ± 1.4    | 1.9 ± 1.0    | 2.0 ± 1.1    | 2.1 ± 1.2    | < .0001 |
| <b>Healthy Eating Index (HEI 2010), score</b>   | 54.0 ± 11.5 | 55.0 ± 11.2  | 55.3 ± 11.0  | 54.8 ± 10.7  | 0.0003  | 58.0 ± 11.6  | 59.9 ± 12.0  | 60.4 ± 11.8  | 58.7 ± 11.3  | < .0001 |
| <b>Caffeine use (regular coffee), times/day</b> | 0.5 ± 0.8   | 0.5 ± 0.8    | 0.5 ± 0.8    | 0.4 ± 0.7    | < .0001 | 0.4 ± 0.8    | 0.4 ± 0.8    | 0.4 ± 0.7    | 0.4 ± 0.7    | < .0001 |
| <b>Soda intake, times/day</b>                   | 0.8 ± 1.1   | 0.8 ± 1.1    | 0.8 ± 1.0    | 0.8 ± 1.0    | 0.0264  | 0.9 ± 1.2    | 0.8 ± 1.1    | 0.8 ± 1.1    | 0.9 ± 1.2    | < .0001 |
| <b>Alcohol Use, n (%)</b>                       |             |              |              |              |         |              |              |              |              |         |
| Yes                                             | 878 (70.4)  | 4,293 (69.0) | 7,001 (70.0) | 3,108 (67.8) | 0.0525  | 900 (44.2)   | 3,989 (43.4) | 6,188 (44.0) | 2,677 (47.8) | < .0001 |
| No                                              | 369 (29.6)  | 1,925 (31.0) | 3,002 (30.0) | 1,473 (32.2) |         | 1,136 (55.8) | 5,193 (56.6) | 7,869 (56.0) | 2,925 (52.2) |         |
| <b>Alcohol, drinks/day</b>                      | 4.9 ± 7.5   | 4.1 ± 6.4    | 3.9 ± 6.1    | 4.1 ± 6.2    | < .0001 | 2.3 ± 5.0    | 1.6 ± 4.0    | 1.5 ± 3.9    | 2.1 ± 4.5    | < .0001 |

540

541

542 Supplemental Table 3. Associations of sleep duration and dietary intakes, stratified by race and sex

| Variable <sup>1</sup>                                | African American     |                      | White              |                      |
|------------------------------------------------------|----------------------|----------------------|--------------------|----------------------|
|                                                      | Male                 | Female               | Male               | Female               |
| <b>Very short sleep (&lt; 5 h/day) – OR (95% CI)</b> |                      |                      |                    |                      |
| Fruits/vegetables                                    | 1.01 (0.97, 1.05)    | 1.03 (1.00, 1.06)*   | 1.04 (0.98, 1.10)  | 1.05 (1.01, 1.10)*   |
| Breads/cereals                                       | 1.04 (0.98, 1.12)    | 0.94 (0.89, 1.00)*   | 0.96 (0.86, 1.08)  | 0.80 (0.73, 0.87)*** |
| Meat                                                 | 0.87 (0.81, 0.93)*** | 0.87 (0.82, 0.92)*** | 0.88 (0.78, 0.99)* | 0.80 (0.73, 0.89)*** |
| <b>Short sleep (5 – 6 h/day) – OR (95% CI)</b>       |                      |                      |                    |                      |
| Fruits/vegetables                                    | 0.99 (0.97, 1.01)    | 0.99 (0.98, 1.01)    | 1.01 (0.98, 1.05)  | 1.01 (0.99, 1.04)    |
| Breads/cereals                                       | 1.00 (0.97, 1.04)    | 1.00 (0.97, 1.03)    | 0.93 (0.88, 0.99)* | 0.93 (0.89, 0.97)**  |
| Meat                                                 | 0.94 (0.91, 0.98)**  | 0.92 (0.89, 0.95)*** | 0.96 (0.90, 1.02)  | 0.93 (0.88, 0.98)**  |
| <b>Long sleep (≥ 9 h/day) – OR (95% CI)</b>          |                      |                      |                    |                      |
| Fruits/vegetables                                    | 1.03 (1.01, 1.05)**  | 1.01 (1.00, 1.03)    | 1.00 (0.95, 1.05)  | 1.01 (0.98, 1.04)    |
| Breads/cereals                                       | 1.05 (1.01, 1.09)*   | 1.02 (0.99, 1.06)    | 0.98 (0.91, 1.06)  | 0.97 (0.91, 1.02)    |
| Meat                                                 | 1.06 (1.02, 1.10)**  | 1.06 (1.03, 1.10)*** | 1.08 (1.00, 1.17)  | 1.04 (0.97, 1.10)    |

543 <sup>1</sup>. Adjusted for age at enrollment (restricted cubic spline), education, marital status, household income, coffee  
544 consumption, beverages intake, HEI, total energy intake, smoking status, alcohol use, BMI, time spent in sitting  
545 behaviors, total work (light, moderate and strenuous), hypertension, CVD or stroke, diabetes, COPD, asthma,  
546 depression, and cancer, hormone replacement therapy (only in females).

547 <sup>2</sup>. All dietary intake items were measured by servings and treated as continuous variables in the models. The ORs  
548 for this section, using meat intake and very short sleep in AA males as an example (OR=0.87, 95% CI, 0.81 –  
549 0.93), should be interpreted as the odds of having very short sleep for AA males decreased by 13% with each  
550 additional serving of meat intake.

551 <sup>3</sup>. \* P<0.05; \*\* P<0.01; \*\*\*P<0.001.

552
